# Supplementary material for: S-nitrosoglutathione reductases are low-copy number, cysteine-rich proteins in plants that control multiple developmental and defense responses in Arabidopsis
Source: Front Plant Sci. 2013 Nov 5;4:430. doi: 10.3389/fpls.2013.00430 (PMC3817919; doi:10.3389/fpls.2013.00430)
Supplement: Supplementary file 2 [file DataSheet1.XLSX]

## Sheet: Sheet1
Supplemental Table 1: Database accession codes for all transcript and non-transcript-supported predicted GSNOR sequences. Paralog indentifier denotes abbreviation used in Supp. Fig. 1 if the specified genome encodes multiple GSNORs.
Organism	Accession number	Database of Accession	Paralog Identifier (for genomes with multiple GSNORs)
Vitus vinifera (wine grape)	CAN61500.1	NCBI GENBANK
Alnus glutinosa (black alder)	CAJ21172.1	NCBI GENBANK
Saccharomyces cervesiae (budding yeast)	NP_010113.1	NCBI GENBANK
Escherichia coli	WP_000842087.1	NCBI GENBANK
Micromonas pusilla (Strain CCMP1545)	gene estExt_fgenesh1_kg.C_60001	Phytozome v9.1
Micromonas pusilla (Strain RCC299)	EuGene.0300010082	Phytozome v9.1
Homo sapiens	NP_000662.3	NCBI GENBANK
Ostreococcus lucimarinus	XP_001421423.1	NCBI GENBANK
Selaginella moellendorffii	XP_002973821.1	NCBI GENBANK
Physcomitrella patens	Pp1s142_105V6	Phytozome v9.1	142-putative mitoch.
Physcomitrella patens	Pp1s65_226V6.4	Phytozome v9.1	65
Phaseolus vulgaris (bean)	Phvul.001G167100	Phytozome v9.1	1g
Phaseolus vulgaris	Phvul.007G154200.1	Phytozome v9.1	7g
Picea sitchensis (Sitka spruce)	ABK23217.1	NCBI GENBANK
Malus domestica (apple)	MDP0000156866	Phytozome v9.1	157
Glycine max (soybean)	XP_003537123.1	NCBI GENBANK	10g
Brachypodium distachyon	XP_003570386.1	NCBI GENBANK
Oriza sativa (rice)	AAB19117.1	NCBI GENBANK
Panicum virgatum (switchgrass)	Pavirv00019640m.g	Phytozome v9.1
Setaria italica (foxtail millet)	XP_004954351.1	NCBI GENBANK
Sorghum bicolor	XP_002453032.1	NCBI GENBANK
Zea mays (maize)	ACG32791.1	NCBI GENBANK
Medicago truncatula	AFK37904.1	NCBI GENBANK
Glycine max	XP_003523232.1	NCBI GENBANK	4g
Glycine max	XP_003554308	NCBI GENBANK	19g
Cucumis sativus (cucumber)	XP_004140582.1	NCBI GENBANK
Mimulus guttatus (monkey flower)	mgv1a008291m.g	Phytozome v9.1
Solanum tuberosum (potato)	ABB72806.1	NCBI GENBANK
Solanum lycopersicum (tomato)	NP_001238796.1	NCBI GENBANK
Populus trichocarpa (poplar)	Potri.014G193800.2	Phytozome v9.1	14g
Thellungiella halophila	Thhalv10003232m	Phytozome v9.1
Brassica rapa (turnip)	Bra033706	Phytozome v9.1
Capsella rubella	EOA13532.1	NCBI GENBANK
Arabidopsis thaliana	AAB06322.1	NCBI GENBANK
Arabidopsis lyrata	gene 494606	Phytozome v9.1
Citrus sinensis (orange)	orange1.1g017000m	Phytozome v9.1
Citrus clementina (clementina)	Ciclev10020620m	Phytozome v9.1
Populus trichocarpa	XP_002301836.1	NCBI GENBANK	2g
Eucalyptus grandis (rose gum)	Eucgr.K01401.1	Phytozome v9.1
Carica papaya	evm.TU.supercontig_87.56	Phytozome v9.1
Aquilegia caerulea (Colorado columbine)	Aquca_025_00074	Phytozome v9.1
Gossypium raimondii (diploid cotton)	Gorai.001G182700.1	Phytozome v9.1	182
Theobroma cacao (cocoa)	EOX94271.1	Phytozome v9.1
Gossypium raimondii	Gorai.001G236500	Phytozome v9.1	236
Malus domestica	MDP0000193167	Phytozome v9.1	193
Fragaria vesca (strawberry)	XP_004290003.1	NCBI GENBANK
Prunus persica (peach)	EMJ01129.1	NCBI GENBANK
Ricinis communis (castor oil plant)	XP_002533630.1	NCBI GENBANK
Manihot esculenta (cassava)	cassava4.1_009978m	Phytozome v9.1
Coccomyxa subellipsoidea	EIE24185.1	NCBI GENBANK
Volvox carteri	XP_002953621.1	NCBI GENBANK
Chlamydomonas reinhardtii	XP_001693934.1	NCBI GENBANK
