# Supplementary material for: S-nitrosoglutathione reductases are low-copy number, cysteine-rich proteins in plants that control multiple developmental and defense responses in Arabidopsis
Source: Front Plant Sci. 2013 Nov 5;4:430. doi: 10.3389/fpls.2013.00430 (PMC3817919; doi:10.3389/fpls.2013.00430)
Supplement: Supplementary file 3 [file DataSheet2.XLS]

## Sheet: Complete MicroarrayData
Supplementary Table 2. Differentiatially expressed genes in hot5-2 compared to Wild type (Col-0). Average Expression represents average gene expression intensity (log2) observed for that gene in all database experiments. Fold change shows log2-fold change in hot5-2 compared to Col-0. Microarray data were analyzed with software Robin (Version 0.9.6 BETA). Differentiatially expressed genes were ide…
Pathway		Gene	Protein	Sub-Class/Notes	Average Expression （log 2)	Fold change (log 2)	p value	Sequence of unknowns less than 100 aa in length
1. Photosynthesis
*	1	At5g38410	RBCS-3B (Ribulose bisphosphate carboxylase small chain 3B / RuBisCO small subunit 3B) (ATS3B)	calvin cyle.rubisco small subunit; along with RBCS-1A responsible for most rubisco in cell.	14.729	1.205	0.002
	2	At1g55490	CPN60B, LEN1 | CPN60B (CHAPERONIN 60 BETA)	Calvin Cyle.rubisco interacting; Mutants in this gene develop lesions on its leaves, has constitute PR-1 expression, expresses systemic acquired resistance (SAR) and develops accelerated cell death to heat shock stress	13.11	1.175	0.001
2. Major CHO Metabolism
	3	At3g54090	FLN1, pfkB-like carbohydrate kinase family protein	degradation.sucrose.fructokinase; potential TRXz target	10.368	1.515	0.001
	4	At3g30720	QQS | QQS (QUA-QUINE STARCH)	synthesis.starch; 59 aa protein	8.894	-1.634	0
3. Minor CHO Metabolism
	5	At2g37760	AKR4C8; Aldo/keto reductase family 4 member C8	minor CHO metabolism, redox transformations involved in biosynthesis, intermediary metabolism, and detoxification. Induced by drought, solt, cold, Botrytis cinerea, virulent and avirulent Pseudomonas	9.05	1.371	0
	6	At5g20250	DIN10 (DARK INDUCIBLE 10)	raffinose family.raffinose synthases.putative	8.645	1.072	0.001
	7	At2g37770	AKR4C9; Aldo/keto reductase family protein	minor CHO metabolism.others, as for AKR4C8	8.001	1.025	0.001
	8	At4g39800	MIPS1 (MYO-INOSITOL-1-PHOSTPHATE SYNTHASE 1)	myo-inositol.InsP Synthases; a loss in MIPS1 resulted in smaller plants with curly leaves and spontaneous production of lesions	14.312	-1.084	0.001
	9	At1g55120	ATFRUCT5 (BETA-FRUCTOFURANOSIDASE 5)	minor CHO metabolism.others	8.617	-1.121	0.004
	10	At1g56600	AtGolS2	galactinol synthases.salt, osmotic, cold stress (not pathogen induced)	10.107	-1.801	0
4. Glycolysis
	11	At2g42600	ATPPC2 (PHOSPHOENOLPYRUVATE CARBOXYLASE 2)	cytosolic branch.phospho-enol-pyruvate carboxylase (PEPC)	11.44	1.099	0.007
7. Oxidative Pentose Phosphate
	12	At1g71100	RSW10 (RADIAL SWELLING 10)	non-reductive PP.ribose 5-phosphate isomerase; induced by Botrytis cinerea, Pseudomonas syringae	9.187	-1.137	0.001
8. TCA Cycle
	13	At3g01500	CA1 (CARBONIC ANHYDRASE 1; ATSABP3 (SALICYLIC ACID BINDING PROTEIN 3)	org. transformation.carbonic anhydrases	11.577	1.373	0.01
	14	At5g14740	CA2 (CARBONIC ANHYDRASE 2)	org. transformation.carbonic anhydrases	10.017	1.062	0.001
10. Cell Wall
	15	At3g44990	XTR8 (XYLOGLUCAN ENDO-TRANSGLYCOSYLASE-RELATED 8)	modification	9.769	1.886	0
	16	At1g26770	ATEXPA10 (ARABIDOPSIS THALIANA EXPANSIN A 10)	modification; Pseudomonas infiltration elicitation	9.979	1.155	0.001
	17	At2g23130	AGP17 (ARABINOGALACTAN PROTEIN 17)	cell wall proteins.AGPs	9.194	1.111	0.001
	18	At4g37800	Xyloglucan endotransglycosylase	modification	9.983	1.005	0.001
	19	At4g24010	ATCSLG1; cellulose synthase/ transferase/ transferase	cellulose synthesis.cellulose synthase	8.387	-1.032	0.003
	20	At5g22740	ATCSLA02; mannan synthase/ transferase	cellulose synthesis	9.618	-1.116	0.001
	21	At5g03760	ATCSLA09; mannan synthase/ transferase	cellulose synthesis	10.543	-1.117	0.001
	22	At4g17030	ATEXLB1 (ARABIDOPSIS THALIANA EXPANSIN-LIKE B1)	modification; some Botrytis cinerea induction	8.373	-1.181	0.001
	23	At2g20870	Cell wall protein precursor	cell wall proteins	9.344	-1.208	0.002
	24	At2g18660	EXLB3 (EXPANSIN-LIKE B3 PRECURSOR)	modification	8.592	-1.227	0
11. Lipid Metabolism
	25	At5g59320	LTP3 (LIPID TRANSFER PROTEIN 3)	lipid metabolism	11.515	2.505	0
	26	At4g25050	ACP4 (acyl carrier protein 4)	FA synthesis and FA elongation.ACP protein; in chloroplast	11.147	1.215	0.001
	27	At5g05580	FAD8 (FATTY ACID DESATURASE 8)	FA desaturation.omega 3 desaturase	10.847	1.037	0.001
	28	At3g12120	FAD2 (FATTY ACID DESATURASE 2)	FA desaturation.omega 6 desaturase	11.574	-1.013	0.003
12. Nitrogen Metabolism
	29	At1g37130	NIA2 (NITRATE REDUCTASE 2)	nitrate metabolism.NR; some induction by elicitors	10.12	1.432	0.001
13. Amino Acid Metabolism
	30	At3g19030	unknown protein	synthesis.serine-glycine-cysteine group.serine.phosphoserine aminotransferase; 60 aa	11.23	1.781	0
	31	At5g65010	ASN2 (ASPARAGINE SYNTHETASE 2)	synthesis.aspartate family.asparagine.asparagine synthetase	9.735	1.41	0
	32	At3g03630	CS26 (cysteine synthase 26)	synthesis.serine-glycine-cysteine group.Chloroplast localized;	8.527	1.279	0.001
	33	At1g69370	CM3 (chorismate mutase 3)	synthesis.aromatic aa.phenylalanine and tyrosine.Responds to Wounding and drought.	9.607	-1.06	0.002
15. Metal handing
	34	At1g07610	MT1C (METALLOTHIONINE 1C)	binding, chelation and storage; 45 aa Cys rich protein; Phloem expressed and copper inducible; induced by infiltration of Pseudomonas syringae	11.527	1.302	0.001
	35	At1g23020	FRO3; ferric-chelate reductase	iron acquisition; transcription regulated by FIT	9.101	1.21	0
	36	At3g15353	MT3 (METALLOTHIONEIN 3)	binding, chelation and storage; 69 aa Cys rich protein; mesophyll expressed	15.225	-1.026	0.01
	37	At2g24850	TAT3 (TYROSINE AMINOTRANSFERASE 3)	binding, chelation and storage; induced by Botrytis cinerea; Pseudomonas half leaf and infiltration, by elicitors Flg22, HrpZ,Oomycete derived GST-Npp1	9.665	-2.903	0
16. Secondary Metabolism
	38	At4g27570	Glycosyltransferase family protein	flavonoids.anthocyanins; induced by cold	10.55	-1.065	0.003
	39	At5g24530	DMR6 (DOWNY MILDEW RESISTANT 6)	2-oxoglutarate (2OG)-Fe(II) oxygenase of unknown function; induced by Eresiphe orontii and in half leaf assay with Pseudomonas syringae	8.972	-1.368	0
	40	At5g25980	TGG2 (GLUCOSIDE GLUCOHYDROLASE 2)	sulfure-containing glucosinolates. degradation. myrosinase. herbivore defense	9.971	-1.965	0
	41	At1g24735	O-methyltransferase	phenylpropanoids.lignin biosynthesis.CCoAOMT	10.744	-2.016	0
	42	At1g52040	MBP1 (MYROSINASE-BINDING PROTEIN 1)	sulfur-containing.glucosinolates.degradation.myrosinase; induced by Botrytis cinerea, infiltrating Pseudomonas syringae, virulaent and avirulent.	11.234	-2.076	8.85e-05
	43	At5g26000	TGG1 (THIOGLUCOSIDE GLUCOHYDROLASE 1)	sulfur-containing.glucosinolates.degradation.myrosinase.Defense to insects	13.804	-2.221	0
17. Hormone Metabolism
	44	At2g21210	Auxin-responsive protein	auxin.induced-regulated-responsive-activated; downregulated in response to chitin oligomers	11.889	1.845	0
	45	At1g05560	UGT75B1 (UDP-GLUCOSYLTRANSFERASE 75B1)	auxin.synthesis-degradation; induced by Botrytis cinerea and infiltrating with Pseudomonas syringae	10.987	1.815	0
	46	At1g74670	Gibberellin-responsive protein (GASA6)	gibberelin.induced-regulated-responsive-activated; endomembrane located	10.174	1.395	0
	47	At2g25450	2-oxoglutarate-dependent dioxygenase	ethylene.synthesis-degradation; Botrytis cinerae, Pseudomonas infiltration	12.962	1.338	0.006
	48	At5g13370	Auxin-responsive GH3 family protein	auxin.induced-regulated-responsive-activated; Botrytis cinerea, Pseudomonas infiltration	8.66	1.248	0.001
	49	At1g75750	GASA1 (GAST1 PROTEIN HOMOLOG 1)	gibberelin.induced-regulated-responsive-activated	10.183	1.247	0
	50	At2g01830	WOL (WOODEN LEG), cytokinin receptor;AHK4 (ARABIDOPSIS HISTIDINE KINASE 4), ATCRE1, CRE1 (CYTOKININ RESPONSE 1)	cytokinin.signal transduction	9.438	-1.154	0.003
	51	At5g43410	Ethylene-responsive factor #96, group IX, B-3	ethylene.signal transduction; strong induction by Botrytis cinerea	13.312	-1.511	0.003
	52	At2g38210	PDX1L4 (PUTATIVE PDX1-LIKE PROTEIN 4)	ethylene.induced-regulated-responsive-activated	11.399	-1.976	0
19. Tetrapyrrole Synthesis
	53	At5g40850	UPM1 (UROPHORPHYRIN METHYLASE 1)	urogen III methylase; SAM dependent	10.35	1.134	0
	54	At5g08280	HEMC (HYDROXYMETHYLBILANE SYNTHASE)l RUG1 (RUGOSA 1)	porphobilinogen deaminase; Mutants spontaneously develop chlorotic leaf lesions in the absence of pathogen attack, resembling the phenotype of lesion-mimic mutants.	11.136	1.1	0.004
	55	At5g26030	FC1 (ferrochelatase 1)	ferrochelatase	9.578	-1.054	0.001
20. Stress Response
	56	At3g04720	PR4 (PATHOGENESIS-RELATED 4)	stress.biotic; botrytis cinerea response; phytophthora infestans response; some Erysiphe response, no elicitor response or pseudomonas response	12.192	1.397	0.001
	57	At5g44420	PDF1.2, PDF1.2A, LCR77 | PDF1.2	stress.biotic.PR-proteins.plant defensins; not responsive to SA; Botrytis cinerea response; phytophthora infestans response; some Erysiphe response, no elicitor response or pseudomonas response	14.212	1.017	0.001
	58	At1g19670	COR1(CORONATINE-INDUCED PROTEIN 1)/CLH1 (CHLOROPHYLLASE 1)	stress.abiotic.touch/wounding/drought; Botrytis cinerea	9.757	-1.013	0.001
	59	At2g03720	MRH6 (morphogenesis of root hair 6)	stress.abiotic.unspecified	14.919	-1.083	0.008
	60	At1g72260	THI2.1 (THIONIN 2.1)	stress.biotic.cysteine rich protein having antimicrobial properties	7.949	-1.117	0.001
	61	At3g48080	Lipase class 3 family protein	stress.biotic; response to virulent and avirulent Pseudomonas syringae	8.121	-1.238	0.001
	62	At1g59218	Disease resistance protein (CC-NBS-LRR class)	stress.biotic.PR-proteins	9.994	-1.272	0.001
	63	At2g43530	Trypsin inhibitor Defensin-like protein	stress.biotic.PR-proteins.proteinase inhibitors.trypsin inhibitor	13.085	-1.282	0.001
	64	At3g04210	Disease resistance protein (TIR-NBS class)	stress.biotic.PR-proteins	11.068	-1.391	0.001
	65	At2g43510	ATTI1; serine-type endopeptidase inhibitor	stress.biotic.PR-proteins.plant defensins; not responsive to SA; Botrytis cinerea response; phytophthora infestans response; some Erysiphe response, no elicitor response or pseudomonas response; induced by Botrytis cinerea; virulent and avirulent Pseudomonas and nonhost bacteria; by bacterial elicitors Flg22, hrpZ and GST-NPP1	9.588	-1.414	0
	66	At3g50470	HR3 (HOMOLOG OF RPW8 3)	stress.biotic.receptors;The RPW8 locus of Arabidopsis thaliana confers broad-spectrum resistance to powdery mildew pathogens	8.612	-1.502	0
	67	At1g24020	MLP423 (MajorLatexPprotein-LIKE PROTEIN 423)	stress.abiotic.unspecified	12.111	-1.65	0
	68	At3g11010	AtRLP34 (Receptor Like Protein 34)	stress.biotic.PR-proteins; induced by virulent in avirulent Pseudomonas in half leaf assay and by non host bacteria; weakly by some elicitors and weakly by Erysiphe orontii	8.649	-1.8	0.002
	69	At1g75040	PR5 (PATHOGENESIS-RELATED GENE 5); thaumatin-like;	stress.biotic;induced by Botrytis cinerea, Pseudomonas half leaf assay (weak); Erysiphe orontii after 4 days.	8.978	-1.821	0.001
	70	At3g50480	HR4 (HOMOLOG OF RPW8 4)	stress.biotic; induction with non-host bacteria and virulent and avirulent Pseudomonas; strongly induced by elicitors Flg22,HrpZ and GST-NPP1; Phytopthera infestans	9.475	-1.861	0.001
	71	At1g73330	DR4 (DROUGHT REPRESSED 4); peptidase inhibitor	stress.biotic.PR-proteins.proteinase inhibitors	10.294	-1.882	0
	72	At2g37570	SLT1 (sodium- and lithium-tolerant 1)	stress.abiotic	14.034	-2.005	0.001
	73	At4g19820	Glycosyl hydrolase family 18 protein	stress.biotic; chitinase II family	11.918	-2.25	0
	74	At2g14610	PR1 (PATHOGENESIS-RELATED GENE 1)	stress.biotic; induced by Botrytis cinerea; Pseudomonas virulent and avirulent; non-host bacteria; NOT by elicitors; induced by Erysiphe orontii and Phytophthora infestans	9.067	-2.78	0
21. Redox Regulation
	75	At4g15690	Glutaredoxin S5	glutaredoxins; cytosolic; CxxS active site	9.612	2.788	6.94e-05
	76	At4g15670	Glutaredoxin S7	glutaredoxins; cytosolic; CxxS active site	9.14	2.758	8.85e-05
	77	At4g15660	Glutaredoxin S8	glutaredoxins; cytosolic; CxxS active site	8.477	2.088	0
	78	At4g15700	Glutaredoxin S3	glutaredoxins; cytosolic; CxxS active site	8.497	1.786	0
	79	At1g03020	Glutaredoxin S1	glutaredoxins; cytosolic; CxxS active site	8.318	1.595	0
	80	At5g61440	ACHT5 (ATYPICAL CYS HIS RICH THIOREDOXIN 5)	thioredoxin; chloroplast	9.139	1.128	0.001
	81	At5g18600	Glutaredoxin S2	glutaredoxins; cytosolic; CxxS active site	10.365	1.064	0.001
	82	At1g20620	CAT3 (CATALASE 3)	dismutases and catalases	12.673	-1.108	0.002
	83	At5g11930	Glutaredoxin C10	glutaredoxins; chloroplast CxxC	9.154	-1.155	0.001
23. Nucleotide Metabolism
	84	At3g18680	Aspartate/glutamate/uridylate kinase family protein	phosphotransfer and pyrophosphatases.uridylate kinase	9.774	1.215	0.001
	85	At5g63310	NDPK2 (NUCLEOSIDE DIPHOSPHATE KINASE 2)	phosphotransfer and pyrophosphatases.nucleoside diphosphate kinase	11.268	1.142	0.006
	86	At1g73540	nudt21 (Nudix hydrolase homolog 21)	salvage.NUDIX hydrolases	8.817	1.085	0.001
26. Misc Function
	87	At2g45180	lipid transfer protein (LTP) family protein	protease inhibitor/seed storage/lipid transfer protein (LTP) family protein; in thylakoid membrane	12.286	1.601	0.002
	88	At2g31750	UGT74D1 (UDP-glucosyl transferase 74D1)	Auxin glycosyl trasnferase	9.655	1.568	0
	89	At2g39920	Acid phosphatase class B family protein	acid and other phosphatases	9.788	1.113	0.005
	90	At3g08920	Rhodanese-like domain-containing protein	rhodanese	9.874	1.057	0.001
	91	At5g07230	lipid transfer protein (LTP) family protein	protease inhibitor/seed storage/lipid transfer protein (LTP) family protein	7.731	-1.008	0.001
	92	At1g75940	ATA27; catalytic/ cation binding / hydrolase	gluco-, galacto- and mannosidases; anther specific	7.986	-1.021	0.002
	93	At3g49110	PRXCA (PEROXIDASE CA); PRX33, peroxidase	peroxidase;May play a role in generating H2O2 during defense responses; induced by Botrytis cinerae, weakly by Psuedomonas syringae, induced by elicitors Flg22, HrpZ and Npp1; strongly induced by Phytophthera infestans	9.945	-1.066	0.001
	94	At3g49120	PRXCB (PEROXIDASE CB)	peroxidases; same as #92	11.56	-1.128	0.003
	95	At4g27560	Glycosyltransferase family protein	UDP glucosyl and glucoronyl transferases	10.784	-1.145	0.002
	96	At5g48485	DIR1 (DEFECTIVE IN INDUCED RESISTANCE 1)	protease inhibitor/seed storage/lipid transfer protein (LTP) family protein; involved in systemic acquired resistance	9.72	-1.153	0.001
	97	At1g66850	lipid transfer protein (LTP) family protein	protease inhibitor/seed storage/lipid transfer protein (LTP) family protein	8.39	-1.349	0.003
	98	At2g23990	early nodulin-like protein 11 (ENODL11)	plastocyanin-like	9.784	-1.389	0.002
	99	At3g04290	LTL1 (LI-TOLERANT LIPASE 1)	GDSL-motif lipase; induced by Phytophthera infestans	11.062	-1.437	0.002
	100	At3g22600	lipid transfer protein (LTP) family protein	protease inhibitor/seed storage/lipid transfer protein (LTP) family protein; induced by Botrytis cinerea, by avirulent Pseudomonas and non host bacteria: by elicitors HrpZ and NPP1; by Phytophthera infestans and weakly by Erisiphe orontii	8.17	-1.523	0.001
	101	At5g43940	GSNOR, HOT5 (sensitive to hot temperatures 5)	alcohol dehydrogenases	11.233	-2.254	0.002
	102	At5g55450	lipid transfer protein (LTP) family protein	protease inhibitor/seed storage/lipid transfer protein (LTP) family protein; induced by Avirulent, virulent Pseudomonas and Erysiphe orontii syringae	10.896	-2.58	6.94e-05
	103	At1g52400	BGLU18 (BETA GLUCOSIDASE 18)	gluco-, galacto- and mannosidases; found in inducible ER bodies on wounding.	13.402	-2.887	0
27. Transcription
	104	At2g41240	BHLH100	bHLH,Basic Helix-Loop-Helix family;key regulator of iron-deficiency responses independent of the master regulator FIT. Likely regulates genes involved in the distribution of iron within the plant.	9.225	2.776	6.94e-05
	105	At3g56980	BHLH039	bHLH,Basic Helix-Loop-Helix family; iron homeostasis	8.539	2.022	0
	106	At1g27730	STZ (salt tolerance zinc finger)	C2H2 zinc finger family; induced by Botrytis cinerea; elicitor HrpZ; and Phytophthora infestans.	9.976	1.771	0
	107	At3g56970	BHLH038	bHLH,Basic Helix-Loop-Helix family; iron homeostasis	8.065	1.561	0
	108	At3g53460	CP29; chloroplast RNA binding protein	unclassified	11.633	1.473	0
	109	At1g80840	WRKY40	WRKY domain transcription factor family; induced by Botrytis cinearea; virulent and avirulent Pseudomonas syringae; Non host bacteria; elicitors Flg22,HrpZ, NPP1; Phytophthera infestans.	8.953	1.41	0
	110	At5g50915	Basic helix-loop-helix (BHLH) family protein	bHLH,Basic Helix-Loop-Helix family	8.559	1.195	0
	111	At4g09040	RNA recognition motif (RRM)-containing protein	RNA binding; chloroplast localized	9.493	1.191	0.001
	112	At5g37260	RVE2 (REVEILLE 2); CIR1 (CIRCADIAN 1) DNA binding / transcription factor	MYB-related transcription factor ; involved in circadian regulation	9.702	1.158	0.002
	113	At3g44750	HDA3 (HISTONE DEACETYLASE 3)	HAD;Controls the development of adaxial/abaxial leaf polarity	10.554	1.132	0
	114	At3g52380	CP33 (CHLOROPLAST RNA BINDING PROTEIN 33); PDE322 (PIGMENT DEFECTIVE 322)	RNA binding	10.019	1.117	0.004
	115	At1g25550	Myb family transcription factor	G2-like transcription factor family, GARP; nitrate inducible, controlled by NIN-like protein transcription factors; weak induction by elicitors, FLG22, HrpZ, NPP1	9.417	1.076	0.001
	116	At5g67420	LBD37 (LOB DOMAIN-CONTAINING PROTEIN 37); trasncription factor	AS2,Lateral Organ Boundaries Gene Family; involved in nitrogen metabolism;The LBD genes also repress many other known N-responsive genes, including key genes required for NO32 uptake and assimilation, resulting in altered NO32 content, nitrate reductase activity/activation, protein, amino acid, and starch levels, and N-related growth phenotypes.	8.721	1.075	0
	117	At5g65100	Ethylene insensitive 3 family protein	EIN3-like(EIL) transcription factor family	8.888	1.066	0.001
	118	At2g34640	PTAC12 (PLASTID TRANSCRIPTIONALLY ACTIVE12)	unclassified	8.725	1.002	0.001
	119	At1g50680	AP2 domain-containing transcription factor	AP2/EREBP, APETALA2/Ethylene-responsive element binding protein family	9.025	-1.014	0.001
	120	At5g61420	MYB28 (myb domain protein 28); PMG1,( PRODUCTION OF METHIONINE-DERIVED GLUCOSINOLATE 1)	MYB domain transcription factor family; Glucosinolates (GS) are important plant secondary metabolites in plant resistance to herbivores, bacteria, and fungi; expressed in trichomes	11.833	-1.043	0.001
	121	At5g10140	FLC (FLOWERING LOCUS C)	MADS box transcription factor family	8.226	-1.105	0.002
	122	At2g45680	TCP family transcription factor	TCP transcription factor family	9.182	-1.107	0.001
	123	At3g05690	NF-YA2 (NUCLEAR FACTOR Y, SUBUNIT A2);UNE8, UNFERTILIZED EMBRYO SAC 8	CCAAT box binding factor family, HAP2	8.354	-1.158	0.002
	124	At3g63350	AT-HSFA7B; DNA binding / transcription factor	HSF,Heat-shock transcription factor family	15.277	-1.204	0.006
	125	At2g39250	SNZ (SCHNARCHZAPFEN)	AP2/EREBP, APETALA2/Ethylene-responsive element binding protein family; can repress flowering	12.455	-1.334	0.001
	126	At5g56840	DNA-binding family protein	MYB-related transcription factor family	8.831	-1.544	0
	127	At2g21650	MEE3 (MATERNAL EFFECT EMBRYO ARREST 3)	MYB-related transcription factor family	9.585	-1.586	0.001
	128	At5g17320	HDG9 (HOMEODOMAIN GLABROUS 9)	HB,Homeobox transcription factor family	11.531	-2.166	0
	129	At5g11590	TINY2 (TINY2)	AP2/EREBP, APETALA2/Ethylene-responsive element binding protein family	11.148	-2.506	8.85e-05
28. DNA
	130	At4g31150	Endonuclease V family protein	DNA.repair	14.416	-1.116	0.007
29. Protein
	131	At3g48360	BT2 (BTB AND TAZ DOMAIN PROTEIN 2)	degradation.ubiquitin.E3.BTB/POZ Cullin3.BTB/POZ	8.494	2.208	8.85e-05
	132	At5g53450	ORG1 (OBP3-responsive gene 1)	postranslational modification	11.061	1.9	0.001
	133	At3g08740	Elongation factor P (EF-P) family protein	protein synthesis.elongation	11.905	1.514	0.002
	134	At1g73310	Scpl4 (serine carboxypeptidase-like 4)	degradation.serine protease	10.16	1.24	0.001
	135	At4g19006	26S proteasome regulatory subunit	degradation.ubiquitin.proteasom	8.782	1.18	0.001
	136	At4g10480	Nascent polypeptide associated complex alpha chain protein	synthesis.elongation	10.138	1.158	0.007
	137	At5g55220	Trigger factor type chaperone family protein	folding; in chloroplast	9.636	1.063	0.003
	138	At2g33800	Ribosomal protein S5 family protein	synthesis.ribosomal protein.prokaryotic.chloroplast.30S subunit.S5	10.552	1.06	0.006
	139	At5g22440	RPL10aC (60S ribosomal protein L10A)	synthesis.ribosomal protein.prokaryotic.unknown organellar.50S subunit.L10A	9.471	1.039	0.005
	140	At5g52440	HCF106	targeting.chloroplast; thylakoid pH transport pathway	10.05	1.026	0.002
	141	At1g79850	RPS17 (RIBOSOMAL PROTEIN S17); PDE347, PIGMENT DEFECTIVE 347	synthesis.ribosomal protein.prokaryotic.chloroplast.30S subunit.S17	10.702	1.023	0.003
	142	At1g78630	Emb1473 (embryo defective 1473)	synthesis.ribosomal protein.prokaryotic.chloroplast.50S subunit.L13	11.73	1.019	0.002
	143	At5g45360	F-box family protein	degradation.ubiquitin.E3.SCF.FBOX	9.307	-1.001	0.001
	144	At5g17840	Chaperone protein dnaJ-related	folding	12.537	-1.044	0.001
	145	At1g77000	SKP2B; ubiquitin-protein ligase	degradation.ubiquitin.E3.SCF.FBOX; induced by virulent and avirulent Pseudomonas syringae	12.606	-1.072	0.001
	146	At2g24480	Zinc finger (C3HC4-type RING finger) family protein	degradation.ubiquitin.E3.RING	8.632	-1.076	0.001
	147	At1g64230	UBC28; UBIQUITIN-CONJUGATING ENZYME 28	degradation.ubiquitin.E2	13.486	-1.126	0
	148	At2g20630	protein phosphatase 2C	postranslational modification; INDUCED BY AVRRPM1	12.4	-1.158	0.003
	149	At4g08470	MAPKKK10	postranslational modification	10.031	-1.21	0
	150	At1g11330	S-locus lectin protein kinase family protein	postranslational modification	9.793	-1.331	0.001
	151	At3g47130	F-box family protein-related	degradation.ubiquitin.E3.SCF.FBOX	10.828	-1.384	0.001
	152	At5g25440	Protein kinase family protein	postranslational modification.kinase.receptor like cytoplasmatic kinase II; induction by non-host bacteria, some by elicitors FLG22, HrpZ	9.029	-1.462	0
	153	At4g32940	GAMMA-VPE (GAMMA VACUOLAR PROCESSING ENZYME)	targeting.secretory pathway.vacuole; upregulated in association with various types of cell death and under stressed conditions	12.342	-1.475	0.001
	154	At3g62290	ATARFA1E (ADP-ribosylation factor A1E)	targeting.secretory pathway.unspecified	13.003	-1.49	0
.	155	At5g41440	Zinc finger (C3HC4-type RING finger) family protein	degradation.ubiquitin.E3.RING	14.036	-2.202	0.001
30. Signalling
	156	At5g49480	ATCP1 (Ca2+-binding protein 1)	calcium;shares sequence similarities with calmodulins	10.152	1.897	0
	157	At1g56340	CRT1 (CALRETICULIN 1)	calcium; weak induction by Pseudomonas syringae; Phytophthora intestans; Eryisiphe orontii	10.482	-1.013	0.006
	158	At1g69730	Protein kinase family protein	receptor kinases.wall associated kinase	9.199	-1.016	0.005
	159	At3g51920	CAM9 (CALMODULIN 9)	calcium; Mutations in this gene alter plant responses to abiotic stress and abscisic acid; reported to be involved in innate immunity	10.95	-1.018	0.001
	160	At2g46600	Calcium-binding protein	calcium	12.535	-1.051	0.001
	161	At4g23150	CRK7, CYSTEINE-RICH RLK (RECEPTOR-LIKE PROTEIN KINASE) 7	receptor kinases.DUF 26; induced by Pseudomonas syringae half leaf assay, induced by HrpZ and NPP1; weakly by Erysiphe ornotii	7.87	-1.127	0.001
	162	At1g56120	kinase	receptor kinases.leucine rich repeat VIII-2; induced by elicitors Flg22, HrpZ, NPP1	8.491	-1.132	0.001
	163	At5g39670	Calcium-binding EF hand family protein	calcium; induced in half leaf Pseudomonas syringae assay; by non-host bacteria; by Erysiphe otontii	8.914	-1.196	0.001
	164	At2g33380	RD20 (RESPONSIVE TO DESSICATION 20), ATCLO3 (CALEOSIN 3)	calcium; induced by infiltration of Pseudomonas syringae virulent and avirulent and non host bacteria; proposed part of oxylipin pathway	11.597	-1.228	0
	165	At1g08450	CRT3 (CALRETICULIN 3); BRI1 SUPPRESSOR 2	calcium; induced by Pseudomonas syringae; Erysiphae orontii	10.632	-1.273	0.001
	166	At2g37710	RLK (receptor lectin kinase)	receptor kinases.misc; induced in response to salicylic acid; induced by Flg22,HrpZ,NPP1	10.354	-1.287	0.004
	167	At2g41100	TCH3 (TOUCH 3)	calmodulin-like; calcium-binding protein	10.341	-1.31	0.002
	168	At3g47480	Calcium-binding EF hand family protein	calcium; induced in half leaf Pseudomonas syringae assay; by non-host bacteria; by Erysiphe otontii; weakly by Flg22,HrpZ,NPP1	8.913	-1.474	0
	169	At2g31880	EVERSHED, EVR, SOBIR1, SUPPRESSOR OF BIR1 1	receptor kinases.leucine rich repeat XI;Regulates cell death and innate immunity; Induced in pseudomonas half leaf assay; induced by Flg22,HrpZ; by Erysiphe ornotii	10.483	-1.493	0.001
	170	At1g21270	WAK2 (WALL-ASSOCIATED KINASE 2)	receptor kinases.wall associated kinase; induced by salacylic acid	11.595	-1.636	0
31. Cell
	171	At2g28640	ATEXO70H5 (exocyst subunit EXO70 family protein H5)	cell.vesicle transport	11.112	1.429	0.001
	172	At5g61650	CYCP4;2 (CYCLIN P4;2)	cell.cycle	12.124	1.179	0.002
	173	At5g15970	KIN2, COR6.6	cell.organisation	14.457	-1.068	0.004
	174	At1g49240	ACT8 (ACTIN 8) FIZ1 (FRIZZY AND KINKED SHOOTS)	cell.organisation	11.163	-1.096	0.001
	175	At5g54610	ANK (ankyrin)	cell.organisation; functions downstream of SNC2 to regulate plant immunity.	8.261	-1.101	0.004
	176	At1g0070	binding / clathrin binding / protein binding / protein transporter	cell.vesicle transport	14.617	-1.187	0.006
	177	At1g35720	ANNAT1 (ANNEXIN ARABIDOPSIS 1); ATOXY5	cell.organisation	12.8	-1.748	0
	178	At4g14365	XB3 ORTHOLOG 4 IN ARABIDOPSIS THALIANA, XBAT34Zinc finger (C3HC4-type RING finger) family protein	cell.organisation;(C3HC4-type RING finger) family protein; induced by Pseudomonas half leaf assay; non-host bacteria; Elicitors Flg22, HrpZ,NPP1; also reported to regulate lateral root development	10.253	-1.934	0
	179	At4g14400	ACD6 (ACCELERATED CELL DEATH 6)	cell.organisation; novel ankryn protein; involved in resistance to Pseudomonas syringae	12.187	-2.513	0.001
32. MicroRNA
	180	At5g08185	MIR162A (MICRORNA 162A)	micro RNA, tragets DCL1	9.931	-1.202	0.003
33. Development
	181	At2g33430	DAL1 (DIFFERENTIATION AND GREENING-LIKE 1); MORF2 (MULTIPLE ORGANELLAR RNA EDITING FACTOR 2)	development.unspecified; organelle gene expression	10.876	1.212	0.001
	182	At1g53230	TCP3 (CYCLOIDEA AND PCF TRANSCRIPTION FACTOR 3);TEOSINTE BRANCHED 1,	development.unspecified	11.156	-1.057	0.001
	183	At4g17670	Senescence-associated protein-related	development.unspecified	9.211	-1.263	0.002
	184	At2g33810	SPL3 (SQUAMOSA PROMOTER BINDING PROTEIN-LIKE 3)	development.squamosa promoter binding like (SPL)	9.319	-1.312	0.001
	185	At1g22160	Senescence-associated protein-related	development.unspecified	11.336	-1.604	0.005
	186	At5g24780	VSP1 (VEGETATIVE STORAGE PROTEIN 1)	development; storage proteins; induced by wounding and response to Jsamonic acid	10.182	-2.186	0
34. Transport
	187	At3g51870	Mitochondrial substrate carrier family protein	calcium	8.652	1.291	0
	188	At3g59140	ATMRP14 (MULTIDRUG RESISTANCE-ASSOCIATED PROTEIN 14)	ABC transporters and multidrug resistance systems	8.917	1.042	0.001
	189	At1g72130	Proton-dependent oligopeptide transport (POT) family protein	peptides and oligopeptides	10.22	-1.054	0.003
	190	At5g10180	AST68; sulfate transmembrane transporter	sulphate	11.551	-1.211	0.002
	191	At5g50800	SWEET13	transport; sucrose efflux	9.013	-1.265	0
	192	At5g58460	ATCHX25 (CATION/H+ EXCHANGER 25)	metal	9.173	-1.306	0
	193	At5g26200	Mitochondrial substrate carrier family protein	metabolite transporters at the mitochondrial membrane	9.556	-1.314	0
35. Not Assigned
	194	At1g47400	Unknown protein	unknown, predicted 50 aa protein	9.717	2.656	8.85e-05	MMSFVANLAI KRFDHASTVY VEDVVDSSRV AYSENGGDDD DSGYDYAPAA
	195	At1g49500	Unknown protein	unknown, predicted 63 aa protein, predicted in endomembrane	11.151	2.511	0	MVTLKMEICI ELLKLTVDFV AAVAESIEVA FRHRPPPVIQ YSSVMYGRRS NYTAVPIPLV GFL
	196	At2g14247	Unknown protein	unknown, predicted 78 aa protein, predicted in chloroplast	10.673	1.777	0	MAPSAAMLIL SHPLVSHKAK NQSLSSPSSV KSTRVFGFLW PWKALDNEDH SAVVLGRLFG DPATIEKRFQ EALEQSCW
	197	At1g32920	Unknown protein	unknown, predicted 78 aa protein, predicted in endomembrane; ethylene signaling; response to chitin, fungus, wounding, jasmonic acid; elicitors FLg22,HrpZ.	10.892	1.741	0	MNSMFSAFDA LFAEVMGKNL MASSFTATTA TTKPAAAPQT QTQEKANASS KKIGLVQKIP RFALELDGLH CFETIVRS
	198	At4g29905	Unknown protein	unknown, predicted 67 aa protein	10.553	1.726	0	MCLEVVYHEE KTELGRQQAP GMCPYCGGKV SAVDIETKWL FCFLPLCFKV KRKYSCSSCE RHLVLYY
	199	At1g47395	Unknown protein	unknown, predicted 50 aa protein, like At1g47400	9.222	1.545	0	MMSYVANLVI KSFDRASVVY VEDVVDSSRA TCVENGGDDD DSGYDYAPAA
	200	At5g61820	Unknown protein	unknown, predicted 475 aa protein, response to symbiotic fungus; induced by Botrytis cinerea, Infiltration of Pseudomonas syringae virulent and avirulent	10.182	1.406	0.007
	201	At4g27654	Unknown protein	unknown, predicted 67 aa protein,	9.951	1.4	0	METSLELVVS LYIVLLDHHR FRIFLLISSI SDIRRLWIVF FFLFFTTFLI EFCFLHTFFK INLKSDS
	202	At1g10522	Unknown protein, PRIN2 (Plastid redox insensitive 2)	unknown; 179 aa protein; impaired in plastid redox signaling and PEP activity	9.554	1.268	0.001
	203	At5g11070	Unknown protein	unknown; 152 aa protein	9.778	1.238	0.001
	204	At3g14900	Unknown protein	unknown; 611 aa protein; predicted in chloroplast	8.641	1.227	0.001
	205	At3g56360	Unknown protein	unknown; 233 aa predicted in chloroplast	9.004	1.223	0.001
	206	At3g23700	S1 RNA-binding domain-containing protein	S1 RNA-binding domain-containing protein; in chloroplast; response to cold	9.759	1.204	0.005
	207	At2g05380	GRP3S (GLYCINE-RICH PROTEIN 3 SHORT ISOFORM)	glycine rich protein; 116 aa; some induction to Botrytis cinerea	12.463	1.141	0.002
	208	At3g26510	Octicosapeptide/Phox/Bem1p (PB1) domain-containing protein	no ontology	10.796	1.12	0.001
	209	At4g16390	SVR7 (SUPPRESSOR OF VARIEGATION 7) unknown protein	no ontology.pentatricopeptide (PPR) repeat-containing protein	9.374	1.101	0.001
	210	At5g28500	Unknown protein	unknown	9.036	1.092	0.002
	211	At3g49580	LSU1 (RESPONSE TO LOW SULFUR 1)	unknown, 94 aa; Response to elicitor Flg22, HrpZ	8.57	1.034	0.001	MANRGGCVTV AAEEMDELRR RNIELSREVA EMKTEMIKLW QRTVVAEEAE EQLCSQLAEL EVESLEQARD YHDRMLFLMD QISRLSSSSV VSSS
	212	At2g32180	PTAC18 (PLASTID TRANSCRIPTIONALLY ACTIVE 18)	unknown	10.828	1.023	0.004
	213	At2g36840	ACT domain-containing protein; ACR10 (ACT DOMAIN REPEAT PROTEIN 10)	PEBP (phosphatidylethanolamine-binding protein) family protein	10.628	1.02	0.002
	214	At4g19280	Unknown protein; transposable element gene	unknown	10.486	-1.002	0.001
	215	at5g62040	Brother of FT and TFL1 protein (BFT)	no ontology	14.752	-1.012	0.009
	216	at5g22545	Unknown protein	unknown	8.568	-1.022	0
	217	At1g58225	Unknown protein	unknown	8.989	-1.024	0.001
	218	At3g47295	Unknown protein	unknown	11.356	-1.031	0.004	MSFGTRLLLF LILTLPLVTS SSPNTLHVSG IVKTGTTSRF LMMTIEDYDD PSANTRHDPS VPTNAKADTT P
	219	At1g68875	Unknown protein	unknown	8.459	-1.044	0.002
	220	At2g26400	ATARD3 (ACIREDUCTONE DIOXYGENASE 3)	Met biosynthesis, sulfur metabolism; induced by non-host bacteria and in half leaf Pseudomonas syringae both avirulent and virulent.	7.968	-1.051	0.001
	221	At2g01300	Unknown protein; best match to unknow AT1G15010	unknown	8.404	-1.068	0.001
	222	At3g19660	Unknown protein	unknown; induced by Botrytis cinerea, Non-host bacteria and avirulent Psuedomonas,by elicitors FLG22, HRPZ, GST-NPP1	9.153	-1.07	0.004
	223	At3g55720	Unknown protein	unknown	9.461	-1.084	0.001
	224	At5g43150	Unknown protein	unknown; 91 aa; induced by virulent Pseudomonas syringae	10.069	-1.114	0	MAGLRWREWW NTMAFPTRRI WNRFTVRVGF RHSGLLRLEH DVSSCEYEDI HIMWNLLHKN EDLTRVPIQQ QQQQRKKPCW NLLGSYLCQR F
	225	At3g27490	Cysteine/Histidine-rich DC1 domain-containing protein	no ontology.C1 domain containing protein; induced by Phytophthera infestans and by elicitor GST-NPP1	8.644	-1.119	0.001
	226	At3g06035	Unknown protein	unknown; GPI anchored membrane protein	10.813	-1.126	0.001
	227	At4g04990	Unknown protein	unknown	14.943	-1.131	0.007
	228	At5g44580	Unknown protein	unknown	12.882	-1.132	0.008
	229	At3g45160	Unknown protein	unknown; 91 aa Putative membrane lipoprotein	11.588	-1.14	0	MGINSKHVVV VIMVMMVIIS SCLAARNIIP RETNQESEKV SREMIIGKEE DSTEKIEHPR SSVENHHYIP RQDFYNYGPG GENNGGGGGG G
	230	At5g07530	GRP17 (GLYCINE RICH PROTEIN 17)	no ontology.glycine rich proteins; oleosin domain; required for proper pollen hydration	7.969	-1.181	0.003
	231	At5g19230	Unknown protein	unknown	10.928	-1.212	0.004
	232	At1g65490	Unknown protein	unknown; 88 aa	10.288	-1.243	0	MGSKSPNIVA LVLPLLLILY TLSSQVEVVE STGRKLAFWG NPIVWTPHSN SCGGSPASVF ASSKWTTGRP CRRSRPPGTN IPVSDQSP
	233	At4g39300	Unknown protein	unknown; 96 aa	10.898	-1.273	0.001	MASFCRSALM AGSRNLVSRS RTVTQKSLNL KPTTTSSPFA SMSQSIPRAS RVLSALGSVE TMIPLHSAVA SARLRSSIAA DSSCWSLLSQ GLATPL
	234	At5g52760	Heavy-metal-associated domain-containing protein	no ontology; induced by Pseudomans syringae half leaf assay; induction by non-host bacteria, by elicitors Flg22, HrpZ, NPP1; Erysiphe orontii	8.549	-1.279	0
	235	At3g30250	Unknown protein	unknown	8.484	-1.292	0.002
	236	At5g44565	Unknown protein	unknown; 73 aa protein	8.661	-1.319	0.001	MGMSGSSGLV HVLMLLLLLS ILFHHTESTL PSDSEQLSIT GRRMMANYKP NTAVETPPSR SRRGGGGQNT GAD
	237	At1g76960	Unknown protein	unknown; 52 aa protein;induced by Botrytis cinerea, Half leaf avirulent and virulent Pseudomonas syringae; Phytophthera infestans	13.791	-1.32	0	MKSSSELLVI MIFLFLALLI ISHAQSLPGT PYGGPGPYPR SYPVCYPPYC RP
	238	Aat5g57760	Unknown protein	unknown; 78 aa protein	8.61	-1.32	0	MKMVKCKKVR HRGRKGQKEK PKFRETCMQR NLGILRRIVP GCEEIEDEEA LFLKSIQHLL LLKSQVNLLK KLADVCGV
	239	At2g21160	Translocon-associated protein alpha (TRAP alpha) family protein	no ontology	12.34	-1.379	0.001
	240	At2g07672	Unknown protein	unknown	10.075	-1.386	0.002
	241	At5g22580	Unknown protein	unknown	12.822	-1.467	0
	242	At3g60420	Phosphoglycerate mutase family protein	unknown; response to Pseudomonas syringae half leaf assay; response to non-host bacteria	9.872	-1.544	0
	243	At1g64360	Unknown protein	unknown; 85 aa protein	11.196	-1.547	0	MSFRKVEKKP TEMGRNMTHE KSDSDSDNEG APMTVGGYTE FVARSDSDWD EPVYSGKARS NYNLTGTAKG TGPINSFSRK HFPNY
	244	At2g16630	Proline-rich family protein;Ole e 1 allergen and extensin family protein	no ontology.proline rich family	12.065	-1.56	0
	245	At1g78420	Unknown protein;RING/U-box superfamily protein	unknown	12.524	-1.567	0.002
	246	At2g39420	Esterase/lipase/thioesterase family protein	no ontology	9.365	-1.579	0.001
	247	At1g27030	Unknown protein	unknown	10.074	-1.597	0
	248	At3g28220	Meprin and TRAF homology domain-containing protein	no ontology	9.076	-1.602	0
	249	At4g01590	Unknown protein	unknown	12.703	-1.676	0.001
	250	At4g25690	Unknown protein	unknown; induced by elicitors FLG22,HrpZ, NPP1	9.399	-1.697	0
	251	At4g11211	Unknown protein	unknown; 21 aa	11.064	-1.712	0	MFTPCTHLTG LDYDDFLNRS G
	252	At1g19960	Unknown protein	unknown; 64 aa	9.961	-1.763	0	MSDPSGQSST TTVGGIAGGS GCNGGGGGSG SGSGGSFGNQ PRRSKVRKQV WAGVLGISSD STNN
	253	At2g14560	LURP1 (LATE UPREGULATED IN RESPONSE TO HYALOPERONOSPORA PARASITICA)	unknown; disease resistance;	10.622	-1.891	0.001
	254	At1g13470	Unknown protein	unknown; induced by Psuedomonas syringae; elicitors Flg22, HrpZ; non-host bacteria; Erysiphe orontii	8.548	-1.968	8.85e-05
	255	At1g70990	Proline-rich family protein	proline rich family; BEST match hydroxyproline-rich glycoprotein (TAIR:AT1G23040.1); plant defense	12.387	-1.997	0.001
	256	At3g04440	Unknown protein	unknown; choline transporter family	14.197	-2.003	0
	257	At3g13140	Hydroxyproline-rich glycoprotein family protein	hydroxyproline rich protein; implicated in plant defense	11.815	-2.092	0
	258	At3g22240	Unknown protein	unknown; 52 or 72 aa protein	11.841	-2.186	0	MRWLVILQPP QWRQSPRAMV FGKDVVLPYA AVVSWMHASE TSELTISCKL LM
	259	At2g07708	Unknown protein	unknown; best match to mitochondrial ORF 141	11.114	-2.189	0
	260	At2g45870	Unknown protein	unknown; Best match is: Bestrophin-like protein (TAIR:AT3G61320.1)	12.072	-2.217	0
	261	At2g32210	Unknown protein	unknown; 71 aa; best match At2g32190; induced by non-host bacteria and avirulent Pseudomonas syringae; by Flg22, HrpZ and GST-NPP1	14.383	-2.337	8.85e-05
	262	At2g32190	Unknown protein	unknown; 71 aa; best match At2g32210; induced by non-host bacteria and avirulent Pseudomonas syringae; by Flg22, HrpZ and GST-NPP1	13.098	-2.344	0
	263	At1g10140	Unknown protein	unknown; best match At1g58420; plasma membrane	11.887	-2.374	0
	264	At2g10380	Unknown protein	unknown; transposable element	13.853	-2.424	0
	265	At2g31160	LSH3 (LIGHT SENSITIVE HYPOCOTYLS 3)	unknown; ALOG protein suggested transcription factor or chromatin repressor	11.149	-2.513	0
	266	At3g22235	Unknown protein	unknown; best match to pathogen and circadian controlled 1 (At3g22231.1); 71 aa protein	11.782	-2.566	8.85e-05	MNQSAQNYFS VQKPSETSSG PYTSPPPIGY PTRDAVVGDP PAAAVETNSK GVNPEGCCAA ICCCCVLDAC F
	267	At5g19800	Hydroxyproline-rich glycoprotein family protein	hydroxyproline rich proteins;96 aa protein; plant defense	13.719	-2.674	8.85e-05	MVSQRFSLTL VFLLAILITV ANGNDNRKLL TSYKYSPPPP PVYSPPISPP PPPPPPPPQS HAAAYKRYSP PPPPSKYGRV YPPPPPGKSL WSFLNL
	268	At1g14880	AtPCR1 (PLANT CADMIUM RESISTANCE 1)	Cys rich; suggested to modulate Ca++, plasma membrane	10.081	-2.864	6.94e-05
	269	At5g19810	Proline-rich family protein	proline rich family; similar to at5g19810; plant defense	14.073	-2.886	8.85e-05

## Sheet: stress induced
Table 1. Changes in "Stress Reponsive" Transcripts in hot5-2 vs. wild-type. p values <10-8 listed as = 0.
Gene	Protein	Stress	Fold change (log 2)	p value
Up-regulated
At3g04720	PR4 (PATHOGENESIS-RELATED 4)	biotic	1.397	0.001
At5g44420	PDF1.2, PDF1.2A, LCR77 ; Defensin	biotic	1.017	0.001
Down-regulated
At2g14610	PR1 (PATHOGENESIS-RELATED GENE 1)	biotic	-2.78	0
At4g19820	Glycosyl hydrolase family 18 protein	biotic	-2.25	0
At2g37570	SLT1 (SODIUM and LITHIUM TOLERANT 1)	abiotic	-2.005	0.001
At1g73330	DR4 (DROUGHT REPRESSED 4); peptidase inhibitor	biotic	-1.882	0
At3g50480	HR4 (HOMOLOG OF RPW8 4)	biotic	-1.861	0.001
At1g75040	PR5 (PATHOGENESIS-RELATED GENE 5); thaumatin-like	biotic	-1.821	0.001
At3g11010	AtRLP34 (Receptor Like Protein 34)	biotic	-1.8	0.002
At1g24020	MLP423 (MajorLatexPprotein-LIKE PROTEIN 423)	abiotic	-1.65	0
At3g50470	HR3 (HOMOLOG OF RPW8 3)	biotic	-1.502	0
At2g43510	ATTI1; serine-type endopeptidase inhibitor	biotic	-1.414	0
At3g04210	Disease resistance protein (TIR-NBS class)	biotic	-1.391	0.001
At2g43530	Trypsin inhibitor Defensin-like protein	biotic	-1.282	0.001
At1g59218	Disease resistance protein (CC-NBS-LRR class)	biotic	-1.272	0.001
At3g48080	Lipase class 3 family protein	biotic	-1.238	0.001
At1g72260	THI2.1 (THIONIN 2.1)	biotic	-1.117	0.001
At2g03720	MRH6 (morphogenesis of root hair 6)	abiotic	-1.083	0.008
At1g19670	COR1 (CORONATINE-INDUCED PROTEIN 1);CHL1 (CHLOROPHYLLASE 1)	abiotic	-1.013	0.001

## Sheet: Redox Regulated
Table 2. Changes in "Redox" Transcripts in hot5-2 vs. wild-type. p values <10-8 listed as = 0.
Gene	Protein	Function/ Localization	Fold change (log2)	p value
Up-regulated
At4g15690	Glutaredoxin S5; ROXY12	glutaredoxin; cytosolic; CCMS active site	2.788	6.94e-05
At4g15670	Glutaredoxin S7: ROXY 14	glutaredoxin; cytosolic; CCMS active site	2.758	8.85e-05
At4g15660	Glutaredoxin S8	glutaredoxin; cytosolic; CCMS active site	2.088	0
At4g15700	Glutaredoxin S3; ROXY15	glutaredoxin; cytosolic; CCMS active site	1.786	0
At1g03020	Glutaredoxin S1; ROXY11	glutaredoxin; cytosolic; CCMS active site	1.595	0
At5g61440	ACHT5 (ATYPICAL CYS HIS RICH THIOREDOXIN 5)	thioredoxin; chloroplast; CGGC active site	1.128	0.001
At5g18600	Glutaredoxin S2; ROXY10	glutaredoxin; cytosolic; CCMS active site	1.064	0.001
Down-regulated
At5g11930	Glutaredoxin C10; ROXY20	glutaredoxin; chloroplast; CCMC active site	-1.155	0.001
At1g20620	CAT3	catalase; Peroxisome; cytosol?	-1.108	0.002
